# Supplementary material for: Differential inhibition of Arabidopsis superoxide dismutases by peroxynitrite-mediated tyrosine nitration
Source: PubMed Central journal article supplement (PMC4321555; doi:10.1093/jxb/eru458), 2014-11-26
Supplement: supp_eru458_jexbot133249_file001.pdf [file supp_eru458_jexbot133249_file001.pdf]

# Differential Inhibition of *Arabidopsis* Superoxide Dismutases by Peroxynitrite-mediated Tyrosine Nitration

Christian Holzmeister, Frank Gaupels, Arie Geerlof, Michael Sattler, Jörg Durner, Christian Lindermayr

## Supplemental Table S1: Oligonucleotides for cloning of superoxide dismutase nucleotide sequences and site-directed mutagenesis

All oligonucleotides were obtained from Eurofins MWG Operon (Martinsried, Germany), diluted in water (100 µM) and stored at -20 °C.

---

| Name                                                                                         | Sequence                           |
|----------------------------------------------------------------------------------------------|------------------------------------|
| <b><u>Oligonucleotides for amplification of superoxid dismutase nucleotide sequences</u></b> |                                    |
| MnSOD_for                                                                                    | 5'- ATGGCGATTCGTTGTGTAGC - 3'      |
| MnSOD_rev (with stop codon)                                                                  | 5'- TCAGTTGTTTTCTTCTCATAAACCC - 3' |
| MnSOD_rev (without stop codon)                                                               | 5'- GTTGTTTTCTTCTCATAAACCTC - 3'   |
| FeSOD1_for                                                                                   | 5'- ATGGCTGCTTCAAGTGCTG - 3'       |
| FeSOD1_rev (with stop codon)                                                                 | 5'- TTAAGCAGAAGCAGCCTTGG - 3'      |
| FeSOD1_rev (without stop codon)                                                              | 5'- AGCAGAAGCAGCCTTGGC - 3'        |
| FeSOD2_for                                                                                   | 5'- ATGATGAATGTTGCAGTGACAG - 3'    |
| FeSOD2_rev (with stop codon)                                                                 | 5'- TTAGTCAACCTCAGATACATCG - 3'    |
| FeSOD2_rev (without stop codon)                                                              | 5'- GTCAACCTCAGATACATCGAT - 3'     |
| FeSOD3_for                                                                                   | 5'- ATGAGTTCTTGTGTTGTGACG - 3'     |
| FeSOD3_rev (with stop codon)                                                                 | 5'- TTAAGCGATTGGGATGTTGG - 3'      |
| FeSOD3_rev (without stop codon)                                                              | 5'- AGCGATTGGGATGTTGGG - 3'        |
| CuZnSOD1_for                                                                                 | 5'- ATGGCGAAAGGAGTTGCAG - 3'       |
| CuZnSOD1_rev (with stop codon)                                                               | 5'- TTAGCCCTGGAGACCAATG - 3'       |
| CuZnSOD1_rev (without stop codon)                                                            | 5'- GCCCTGGAGACCAATGAT - 3'        |
| CuZnSOD2_for                                                                                 | 5'- ATGGCTGCCACCAACACAA - 3'       |
| CuZnSOD2_rev (with stop codon)                                                               | 5'- TTAGAGCGGCGTCAAGC - 3'         |
| CuZnSOD2_rev (without stop codon)                                                            | 5'- GAGCGGCGTCAAGCCA - 3'          |
| CuZnSOD3_for                                                                                 | 5'- ATGGAAGCTCCTAGAGGAAATC - 3'    |
| CuZnSOD3_rev (with stop codon)                                                               | 5'- CTATAGTTTAGCATCCGCAGAT - 3'    |
| CuZnSOD3_rev (without stop codon)                                                            | 5'- TAGTTTAGCATCCGCAGATGATT - 3'   |

### Oligonucleotides for GATEWAY-Cloning of superoxide dismutase nucleotide sequences

|                                       |                                                                                  |
|---------------------------------------|----------------------------------------------------------------------------------|
| attB1_MnSOD_for (with stop codon)     | 5'- GGGACAAGTTTGTACAAAAAAGCAGGCTTCATG<br>GCGATTCGTTGTGTAGC - 3'                  |
| attB2_MnSOD_rev (with stop codon)     | 5'- GGGGACCACTTTGTACAAGAAAGCTGGGTCTCA<br>GTTGTTTTCTTCATAAACC - 3'                |
| attB1_MnSOD_for (without stop codon)  | 5'-GGGACAAGTTTGTACAAAAAAGCAGGCTTCGA<br>AGGAGATAGAACCATGGCGATTGTTGTGTAGC - 3'     |
| attB2_MnSOD_rev (without stop codon)  | 5'- GGGGACCACTTTGTACAAGAAAGCTGGGTCGTTGT<br>TTTCTTCATAAACCTC - 3'                 |
| <hr/>                                 |                                                                                  |
| attB1_FeSOD1_for (with stop codon)    | 5'- GGGACAAGTTTGTACAAAAAAGCAGGCTTCATGG<br>CTGCTTCAAGTGCTG - 3'                   |
| attB2_FeSOD1_rev (with stop codon)    | 5'- GGGGACCACTTTGTACAAGAAAGCTGGGTCTTAAG<br>CAGAAGCAGCCTTGG - 3'                  |
| attB1_FeSOD1_for (without stop codon) | 5'- GGGACAAGTTTGTACAAAAAAGCAGGCTTCGAAG<br>GAGATAGAACCATGGCTGCTTCAAGTGCTG - 3'    |
| attB2_FeSOD1_rev (without stop codon) | 5'- GGGACCACTTTGTACAAGAAAGCTGGGTCAGCAG<br>AAGCAGCCTTGGC - 3'                     |
| <hr/>                                 |                                                                                  |
| attB1_FeSOD2_for (with stop codon)    | 5'- GGGGACAAGTTTGTACAAAAAAGCAGGCTTCATGA<br>TGAATGTTGCAGTGACAG - 3'               |
| attB2_FeSOD2_rev (with stop codon)    | 5'- GGGGACAAGTTTGTACAAAAAAGCAGGCTTCATGA<br>TGAA - 3'                             |
| attB1_FeSOD2_for (without stop codon) | 5'- GGGACAAGTTTGTACAAAAAAGCAGGCTTCGAAG<br>GAGATAGAACCATGATGAATGTTGCAGTGACAG - 3' |
| attB2_FeSOD2_rev (without stop codon) | 5'- GGGGACCACTTTGTACAAGAAAGCTGGGTCGTCAA<br>CCTCAGATACATCGAT - 3'                 |
| <hr/>                                 |                                                                                  |
| attB1_FeSOD3_for (with stop codon)    | 5'- GGGGACAAGTTTGTACAAAAAAGCAGGCTTCATGA<br>GTTCTTGTGTTGTGACG - 3'                |
| attB2_FeSOD3_rev (with stop codon)    | 5'- GGGGACCACTTTGTACAAGAAAGCTGGGTCTTAAG<br>CGATTGGGATGTTGG - 3'                  |
| attB1_FeSOD3_for (without stop codon) | 5'- GGGACAAGTTTGTACAAAAAAGCAGGCTTCGAAG<br>GAGATAGAACCATGAGTTCTTGTGTTGTGACG - 3'  |
| attB2_FeSOD3_rev (without stop codon) | 5'- GGGACCACTTTGTACAAGAAAGCTGGGTCAGCGA<br>TTGGGATGTTGGG - 3'                     |

|                                         |                                                                                   |
|-----------------------------------------|-----------------------------------------------------------------------------------|
| attB1_CuZnSOD1_for (with stop codon)    | 5'- GGGACAAGTTTGTACAAAAAAGCAGGCTTCATGG<br>CGAAAGGAGTTGCAG - 3'                    |
| attB2_CuZnSOD1_rev (with stop codon)    | 5'- GGGGACCACTTTGTACAAGAAAGCTGGGTCTTAGC<br>CCTGGAGACCAATG - 3'                    |
| attB1_CuZnSOD1_for (without stop codon) | 5'- GGGACAAGTTTGTACAAAAAAGCAGGCTTCGAAG<br>GAGATAGAACCATGGCGAAAGGAGTTGCAG - 3'     |
| attB2_CuZnSOD1_rev (without stop codon) | 5'- GGGACCACTTTGTACAAGAAAGCTGGGTGCGCCCTG<br>GAGACCAATGAT - 3'                     |
| <hr/>                                   |                                                                                   |
| attB1_CuZnSOD2_for (with stop codon)    | 5'- GGGACAAGTTTGTACAAAAAAGCAGGCTTCATGG<br>TTTCCGCGGCGAAGAAGGC - 3'                |
| attB2_CuZnSOD2_rev (with stop codon)    | 5'- GGGGACCACTTTGTACAAGAAAGCTGGGTCTTAGA<br>GCGGCGTCAAGC - 3'                      |
| attB1_CuZnSOD2_for (without stop codon) | 5'- GGGACAAGTTTGTACAAAAAAGCAGGCTTCGAAG<br>GAGATAGAACCATGGTTTCCGCGGCGAAGAAGGC - 3' |
| attB2_CuZnSOD2_rev (without stop codon) | 5'- GGGACCACTTTGTACAAGAAAGCTGGGTGCGAGCG<br>GCGTCAAGCCA - 3'                       |
| <hr/>                                   |                                                                                   |
| attB1_CuZnSOD3_for (with stop codon)    | 5'- GGGACAAGTTTGTACAAAAAAGCAGGCTTCATGG<br>AAGCTCCTAGAGGAAATC - 3'                 |
| attB2_CuZnSOD3_rev (with stop codon)    | 5'- GGGGACCACTTTGTACAAGAAAGCTGGGTCTTATA<br>GTTTAGCATCCGCAGAT - 3'                 |
| attB1_CuZnSOD3_for (without stop codon) | 5'- GGGACAAGTTTGTACAAAAAAGCAGGCTTCGAAG<br>GAGATAGAACCATGGAAGCTCCTAGAGGAAATC - 3'  |
| attB2_CuZnSOD3_rev (without stop codon) | 5'- GGGGACCACTTTGTACAAGAAAGCTGGGTCTAGTT<br>TAGCATCCGCAGATGATT - 3'                |

### **Oligonucleotides for site-directed mutagenesis**

|               |                                      |
|---------------|--------------------------------------|
| MnSODY63F_for | 5'- CATCACCAGGCTTTTGTACTAATTAC - 3'  |
| MnSODY63F_rev | 5'- GTAATTAGTAACAAAAGCCTGGTGATG - 3' |

---

Arabidopsis FSDs

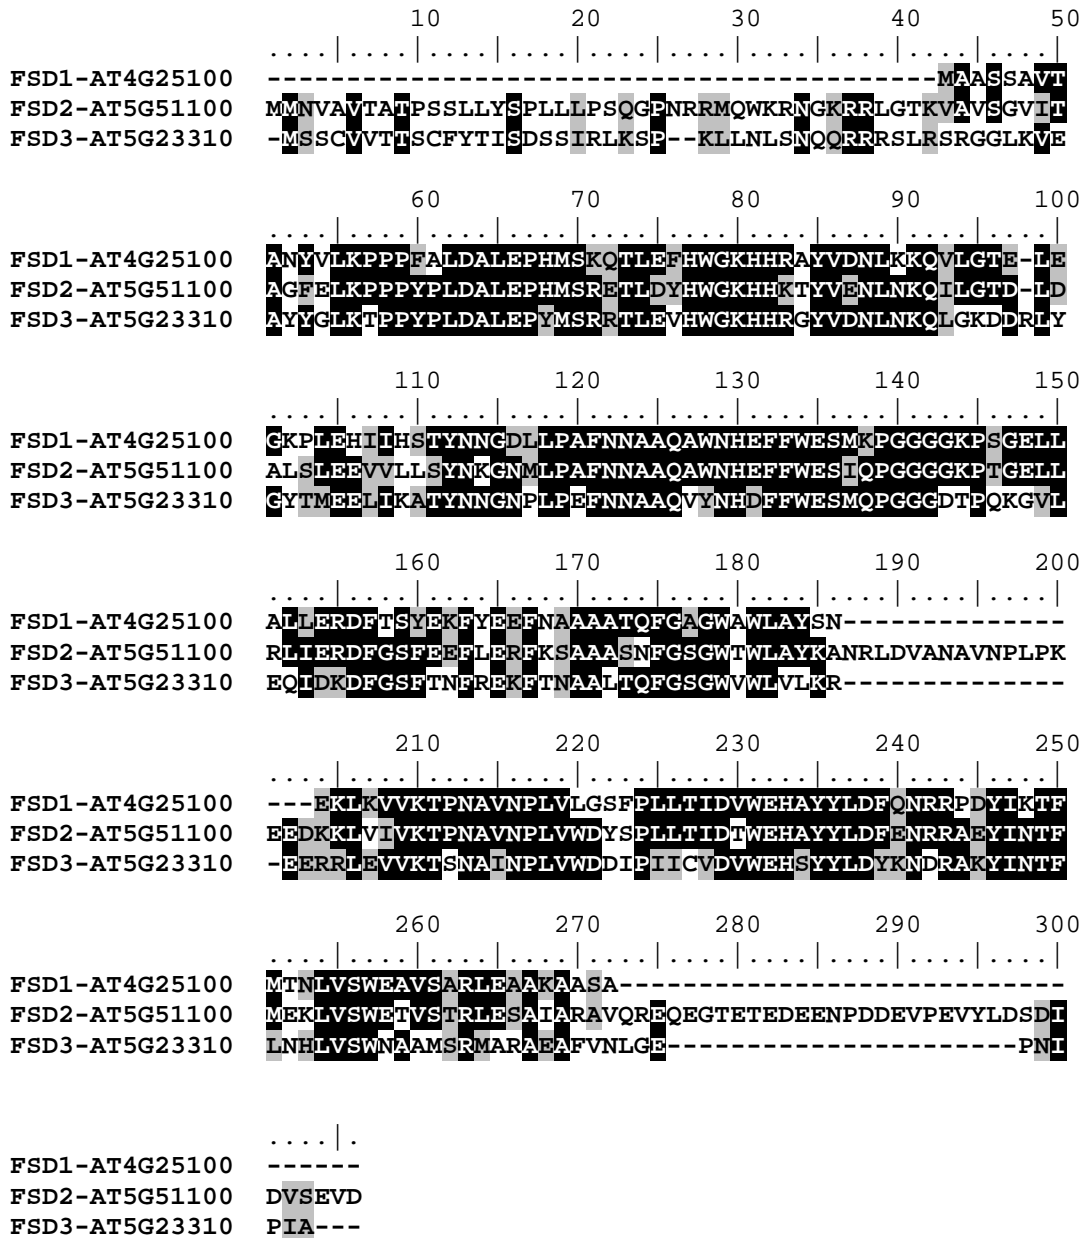

**Supplemental Figure S1: Alignment of amino acid sequences of Arabidopsis FSD isoforms.** Identical amino acids are highlighted in black, similar ones in grey. Dashes: Introduced gaps to maximize sequence similarity.

Arabidopsis CSDs

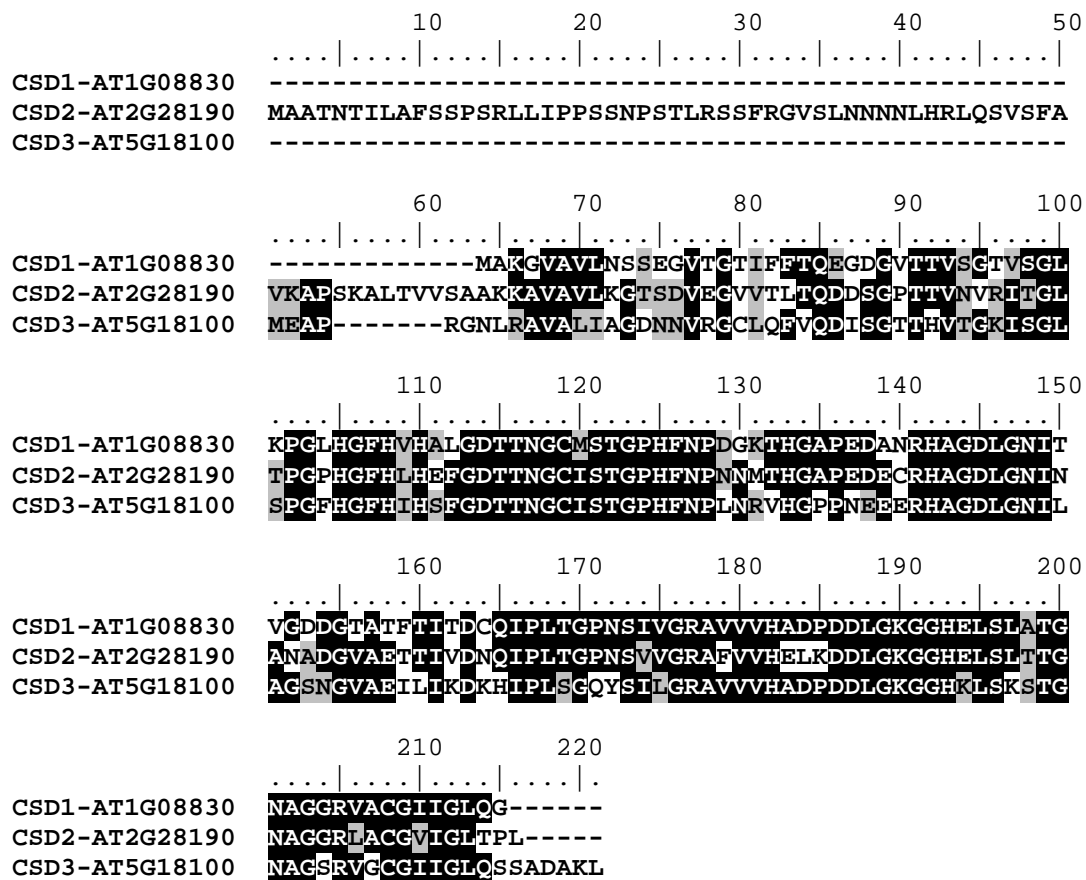

**Supplemental Figure S2: Alignment of amino acid sequences of *Arabidopsis* CSD isoforms.** Identical amino acids are highlighted in black, similar ones in grey. Dashes: Introduced gaps to maximize sequence similarity.

*Arabidopsis* MSD1-FSDs

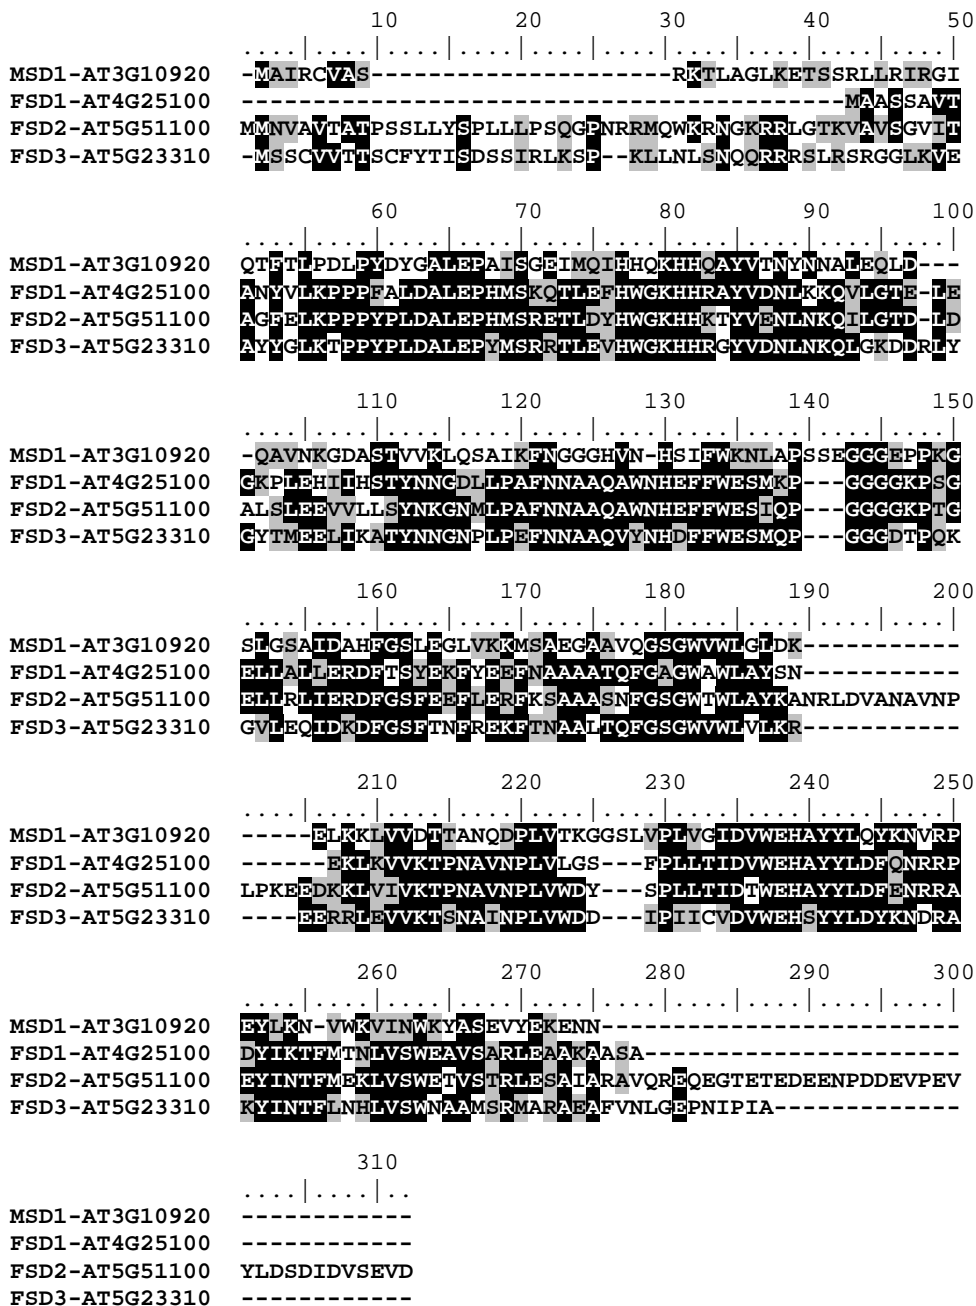

**Supplemental Figure S3: Alignment of amino acid sequences of *Arabidopsis* FSD isoforms and MSD1.** Identical amino acids are highlighted in black, similar ones in grey. Dashes: introduced gaps to maximize sequence similarity.

*Arabidopsis* MSD1-CSDs

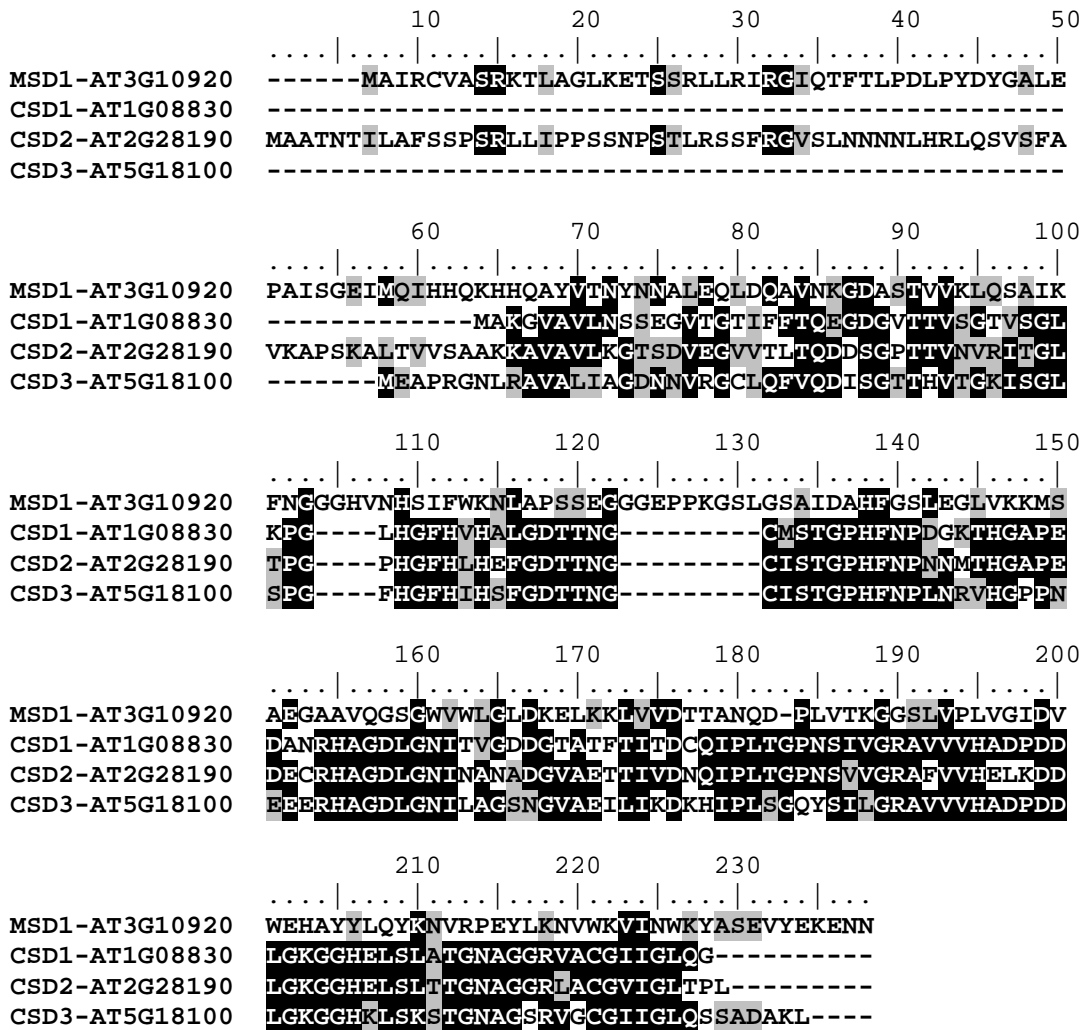

**Supplemental Figure S4: Alignment of amino acid sequences of *Arabidopsis* CSD isoforms and MSD1.** Identical amino acids are highlighted in black, similar ones in grey. Dashes: Introduced gaps to maximize sequence similarity.

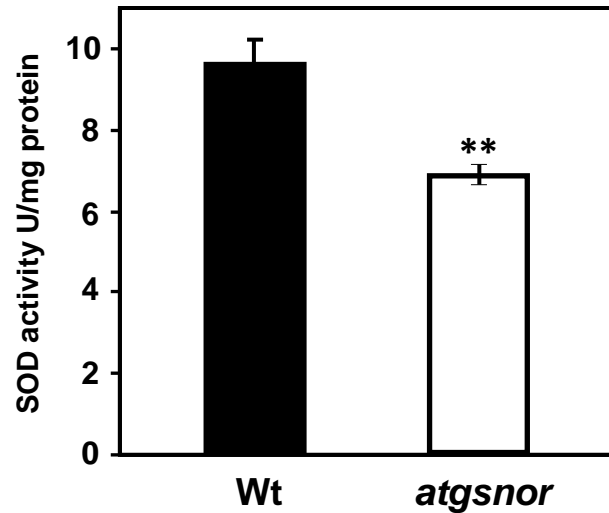

**Figure S5: Total SOD activity in *Arabidopsis* WT and GSNOR knock-out plants.** Proteins of 0,5 g leaf material of four week old plants were extracted with 1 ml extraction buffer. Total SOD activity was determined by monitoring reduction of cytochrome *c*. One unit is defined as enzyme amount necessary for 50% inhibition of cytochrome *c* reduction. Asterisks (\*\*) indicate a significant difference between both lines (t-test,  $p \leq 0.01$ ).



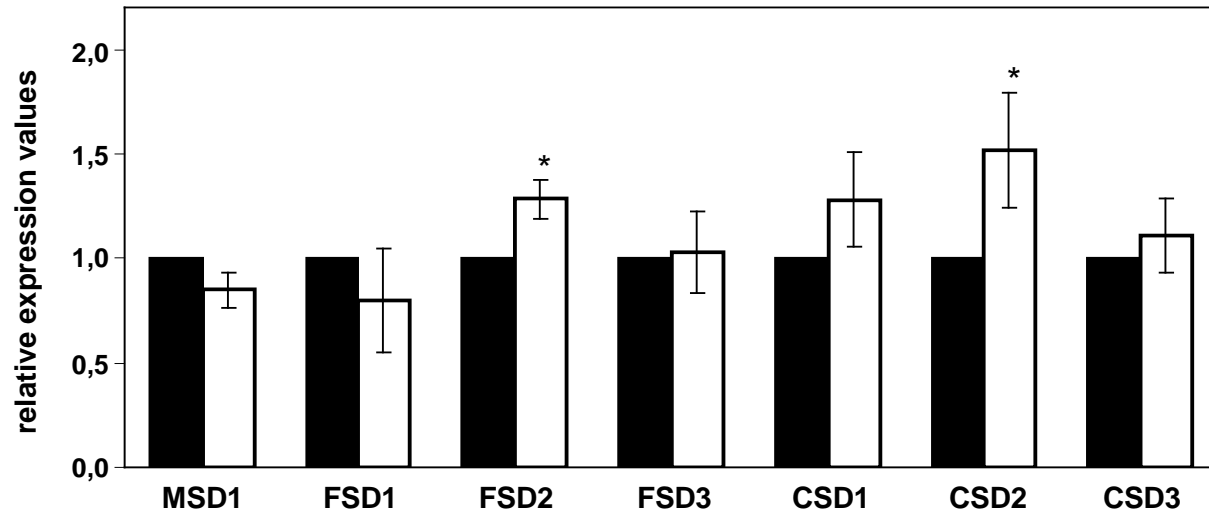

**Figure S6: Expression analysis of *Arabidopsis* SODs.**

Transcripts of *Arabidopsis* SODs were analysed by real-time quantitative PCR. Data represent the means  $\pm$ SD of three experiments per lines. Normalization of real-time quantitative RT-PCR data was done by geometric averaging of multiple internal control genes (Ubiquitin 9 [At5g18380] and S16 [At5g18380 and At2g09990]).
